# Supplementary material for: Willingness to Get the COVID-19 Vaccine among Residents of Slum Settlements
Source: MDPI journal article supplement (doi:10.3390/vaccines9090951), 2021-08-26
Supplement: s1 [file s1]

**Table S1.** Multinomial regression model of factors associated with COVID-19 vaccine hesitancy

| Characteristic                                          | Univariable        |                    | Multivariable      |                    |
|---------------------------------------------------------|--------------------|--------------------|--------------------|--------------------|
|                                                         | Yes vs Not Sure    | Yes vs No          | Not Sure vs Yes    | No vs Yes          |
|                                                         | OR (95% CI)        | OR (95% CI)        | OR (95% CI)        | OR (95% CI)        |
| Age (years)                                             | 0.99 (0.98 – 1.01) | 0.98 (0.97 – 0.99) | 0.99 (0.98 – 1.01) | 0.97 (0.96 – 0.99) |
| Schooling                                               |                    |                    |                    |                    |
| 0 to 6                                                  | 1.24 (0.76 – 1.99) | 0.93 (0.68 – 1.26) |                    |                    |
| ≥ 7                                                     | —                  | —                  |                    |                    |
| Employment                                              |                    |                    |                    |                    |
| Formal                                                  | —                  | —                  |                    |                    |
| Informal                                                | 0.51 (0.24 – 1.10) | 0.53 (0.34 – 0.82) |                    |                    |
| Unemployed                                              | 0.89 (0.53 – 1.51) | 0.83 (0.60 – 1.15) |                    |                    |
| Per capita daily household income (USD)                 | 0.95 (0.90 – 0.99) | 0.96 (0.94 – 0.99) | 0.94 (0.89 – 0.99) | 0.97 (0.94 – 1.01) |
| Underlying medical condition <sup>1</sup>               | 0.74 (0.39 – 1.29) | 0.6 (0.41 – 0.87)  |                    |                    |
| Have you ever been tested to see if you have COVID-19?  | 0.4 (0.15 – 0.87)  | 0.66 (0.42 – 1.00) |                    |                    |
| Received molecular testing                              | 0.41 (0.10 – 1.14) | 0.37 (0.17 – 0.72) |                    |                    |
| Receive the influenza vaccine in 2020?                  | 0.43 (0.24 – 0.74) | 0.5 (0.34 – 0.73)  |                    |                    |
| How likely are you to get the the COVID-19?             |                    |                    |                    |                    |
| Very probable                                           | —                  | —                  |                    |                    |
| Moderately probable                                     | 1.23 (0.61 – 2.53) | 1.06 (0.68 – 1.64) |                    |                    |
| Slightly probable                                       | 1.72 (0.88 – 3.44) | 1.26 (0.82 – 1.95) |                    |                    |
| Not probable                                            | 1.49 (0.68 – 3.24) | 1.97 (1.26 – 3.09) |                    |                    |
| Don't know                                              | 0.9 (0.35 – 2.12)  | 1.05 (0.63 – 1.72) |                    |                    |
| How severe would the COVID-19 be?                       |                    |                    |                    |                    |
| Very severe                                             | —                  | —                  |                    |                    |
| Moderately severe                                       | 3.31 (1.47 – 7.99) | 0.91 (0.56 – 1.46) |                    |                    |
| Slightly severe                                         | 2.91 (1.34 – 6.85) | 0.97 (0.63 – 1.48) |                    |                    |
| Not severe                                              | 2.71 (1.11 – 6.90) | 1.81 (1.16 – 2.83) |                    |                    |
| Don't know                                              | 2.07 (0.92 – 4.99) | 0.84 (0.54 – 1.29) |                    |                    |
| How important is vaccination to protect family/friends? |                    |                    |                    |                    |
| Extremely important                                     | —                  | —                  | —                  | —                  |
| Very important                                          | 0.93 (0.50 – 1.70) | 3.23 (2.11 – 5.08) | 0.87 (0.47 – 1.59) | 3 (1.92 – 4.68)    |
| Moderately important                                    | 8 (3.00 – 20.9)    | 13.8 (6.24 – 31.7) | 7.03 (2.67 – 18.5) | 11.4 (5.01 – 25.7) |
| Slightly important                                      | 19.6 (6.84 – 61.3) | 22 (8.40 – 65.3)   | 20.6 (6.93 – 61.3) | 23.2 (8.33 – 64.7) |

|                                                                             |                    |                    |                   |                   |
|-----------------------------------------------------------------------------|--------------------|--------------------|-------------------|-------------------|
| Not important                                                               | 32 (10.3 – 122)    | 95 (35.7 – 331)    | 32.1 (9.57 – 108) | 95.6 (31.9 – 286) |
| How important is<br>vaccination to protect the<br>health of your community? |                    |                    |                   |                   |
| Extremely important                                                         | —                  | —                  |                   |                   |
| Very important                                                              | 0.92 (0.49 – 1.73) | 3.04 (1.95 – 4.85) |                   |                   |
| Moderately important                                                        | 6.65 (2.54 – 16.8) | 12.3 (5.83 – 26.9) |                   |                   |
| Slightly important                                                          | 16.6 (6.79 – 42.7) | 19.4 (8.61 – 46.5) |                   |                   |
| Not important                                                               | 12.2 (4.67 – 32.5) | 39.5 (18.8 – 90.9) |                   |                   |

---

OR = Odds Ratio – CI = Confidence Interval

<sup>1</sup> Hypertension, diabetes and cancer
